# Supplementary material
Source: MDPI journal article supplement (https://www.mdpi.com/2071-1050/13/22/12599)
Supplement: s1 [file s1]

Archive with 3 entries (3 files):
- Supplementary material 1.pdf
- Supplementary material 2.pdf
- Supplementary material 3.xlsx
