# Supplementary material
Source: MDPI journal article supplement (https://www.mdpi.com/2071-1050/13/22/12599)
Supplement: s1 [file s1 › Supplementary material 1.pdf]

TITLE-ABS-KEY ( ( "canvas" OR "loca" OR "Alpro" OR "Amul" OR "Amy's kitchen" OR "Daiya Foods" OR "Earth's Own Food Company" OR "Eden Foods Inc." OR "Food For Life Global" OR "Miyoko's Creamery" OR "Oatly" OR "Perfect Day" OR "Plamil Foods" OR "Ripple Foods" OR "Sahmyook Foods" OR "WhiteWave Foods" OR "Grounded Foods" OR "NuMilk" OR "Nutpods" OR "Nuqo Foods" OR "Fora Foods" OR "The Coconut Collaborative" OR "Les Nouveaux Affineurs" OR "New Roots" OR "TurtleTree Labs" OR "Marvelous Foods" OR "Almande" OR "Rebbl" OR "Kite Hill" OR "NUMU Vegan Cheese" OR "Good Karma Foods" OR "Forager Project" OR "Field Roast" OR "Eclipse Foods" OR "Heartbest Foods" OR "Fry's Family Food Co" OR "Hodo Soy Beanery" OR "NadaMoo" OR "Three Trees" OR "Blue Diamond" OR "Chicago Vegan Foods" OR "Van Leeuwen" OR "Gardener Cheese Company" OR "Pacific Foods" OR "Green Vie Foods" OR "Elmhurst Milked" OR "We Love Soy Inc" OR "Uproot" OR "Urban Remedy" OR "WayFare" OR "Bolthouse Farms" OR "Climax Foods" OR "Spero Foods" OR "VBites" OR "Veggyness" OR "Fauxmagerie Zengarry" OR "MADE WITH LUVE" OR "Pivotal Foods" OR "8th Continent" OR "Ajoyo" OR "Anita's Coconut Yogurt" OR "Blue Mountain Organics" OR "Boulder Brands" OR "Bute Island Foods" OR "Califia Farms" OR "Cheese the Queen" OR "ChiaViva!" OR "Culcherd" OR "Devon Garden Foods" OR "Else Nutrition" OR "Follow Your Heart" OR "Fomu" OR "Fresh Start Fauxmage" OR "Gusta Foods" OR "Harmless Harvest" OR "Heidi Ho" OR "The Honest Stand" OR "Lyrical Foods" OR "Lavva" OR "Leaf Cuisine" OR "Prosperity Organic Foods" OR "Mooala" OR "Nana Creme" OR "Nancy's" OR "Nature & Moi" OR "New Barn Organics" OR "Bliss Unlimited" OR "NotCo" OR "Halsa Foods" OR "Green Grass Foods" OR "Perennial / Willow Cup" OR "Pop & Bottle" OR "Reveri" OR "Revolution Gelato" OR "Ruby Rockets" OR "Seva Foods" OR "Siete Foods" OR "Turtle Mountain (So Delicious)" OR "Spread'Em Kitchen" OR "Sweet Action Ice Cream" OR "Tofutti" OR "Sirabella's" OR "Vida Veg" OR "Vitasoy" OR "Vixen Kitchen" OR "Wildwood Harvest Foods" OR "Wonderlab Doozy" OR "YoFiit" OR "Yofix" OR "Aveyo" OR "Banyan Foods" OR "Born Formula" OR "Cado Ice Cream" OR "Canvas" OR "Cashewbert" OR "Co Yo" OR "Freezees Nutcreem Foods" OR "Frill" OR "Good Groceries Company" OR "Goodfoods" OR "Goodnuss" OR "Harvest Beverage Group" OR "Incredible Foods" OR "Jule's Foods" OR "Klein's Ice Cream" OR "Lisanatti" OR "Little Baby's Ice Cream" OR "Living Harvest" OR "Malk Organics" OR "Maybels" OR "milkadamia" OR "Mr. Dewie's" OR "No Cow" OR "Nuttin Ordinary" OR "Parmela" OR "Plant Veda" OR "PlantLX" OR "Pleese Foods" OR "Pure Abundance" OR "Sweet Nothings" OR "Vegusto" OR "Violife" OR "Vtopian Artisan Cheeses" OR "Westsoy" OR "Wink" OR "ZenSoy" OR "dairy free cream\*" OR "dairy-free cream\*" OR "non dairy cream\*" OR "non-dairy cream\*" OR "vegan cream\*" OR "vegetarian cream\*" OR "plant based cream\*" OR "plant-based cream\*" OR "artificial cream\*" OR "oat cream\*" OR "soy cream\*" OR "soy based cream\*" OR "soy-based cream\*" OR "cream\* substitute" OR "artificial cream\*" OR "dairy free cheese" OR "dairy-free cheese" OR "non dairy cheese" OR "non-dairy cheese" OR "vegan cheese" OR "vegetarian cheese" OR "plant based cheese" OR "plant-based cheese" OR "artificial cheese" OR "oat cheese" OR "soy cheese" OR "soy based cheese" OR "soy-based cheese" OR "cheese substitute" OR "artificial cheese" OR "dairy free sour cream" OR "dairy-free sour cream" OR "non dairy sour cream" OR "non-dairy sour cream" OR "vegan sour cream" OR "vegetarian sour cream" OR "plant based sour cream" OR "plant-based sour cream" OR "artificial sour cream" OR "oat sour cream" OR "soy sour cream" OR "soy based sour cream" OR "soy-based sour cream" OR "sour cream substitute" OR "artificial sour cream" OR "dairy free soft cheese" OR "dairy-free soft cheese" OR "non dairy soft cheese" OR "non-dairy soft cheese" OR "vegan soft cheese" OR "vegetarian soft cheese" OR "plant based soft cheese" OR "plant-based soft cheese" OR "artificial soft cheese" OR "oat soft cheese" OR "soy soft cheese" OR "soy based soft cheese" OR "soy-based soft cheese" OR "soft cheese substitute" OR "artificial soft cheese" OR "dairy free hard cheese" OR "dairy-free hard cheese" OR "non dairy hard cheese" OR "non-dairy hard cheese" OR "vegan hard cheese" OR "vegetarian hard cheese" OR "plant based hard cheese" OR "plant-based hard cheese" OR "artificial hard cheese" OR "oat hard cheese" OR "soy hard cheese" OR "soy based hard cheese" OR "soy-based hard cheese" OR "hard cheese substitute" OR "artificial hard cheese" OR "dairy free cream cheese" OR "dairy-free cream cheese" OR "non dairy cream cheese" OR "non-dairy cream

cheese" OR "vegan cream cheese" OR "vegetarian cream cheese" OR "plant based cream cheese" OR "plant-based cream cheese" OR "artificial cream cheese" OR "oat cream cheese" OR "soy cream cheese" OR "soy based cream cheese" OR "soy-based cream cheese" OR "cream cheese substitute" OR "artificial cream cheese" OR "dairy free creme fraiche" OR "dairy-free creme fraiche" OR "non dairy creme fraiche" OR "non-dairy creme fraiche" OR "vegan creme fraiche" OR "vegetarian creme fraiche" OR "plant based creme fraiche" OR "plant-based creme fraiche" OR "artificial creme fraiche" OR "oat cream fraiche" OR "soy creme fraiche" OR "soy based creme fraiche" OR "soy-based creme fraiche" OR "creme fraiche substitute" OR "artificial creme fraiche" OR "dairy free fraiche" OR "dairy-free fraiche" OR "non dairy fraiche" OR "non-dairy fraiche" OR "vegan fraiche" OR "vegetarian fraiche" OR "plant based fraiche" OR "plant-based fraiche" OR "artificial fraiche" OR "oat fraiche" OR "soy fraiche" OR "soy based fraiche" OR "soy-based fraiche" OR "fraiche substitute" OR "artificial fraiche" OR "dairy free sour cream" OR "dairy-free sour cream" OR "non dairy sour cream" OR "non-dairy sour cream" OR "vegan sour cream" OR "vegetarian sour cream" OR "plant based sour cream" OR "plant-based sour cream" OR "artificial sour cream" OR "oat sour cream" OR "soy sour cream" OR "soy based sour cream" OR "soy-based sour cream" OR "sour cream substitute" OR "artificial sour cream" OR "dairy free ice cream" OR "dairy-free ice cream" OR "non dairy ice cream" OR "non-dairy ice cream" OR "vegan ice cream" OR "vegetarian ice cream" OR "plant based ice cream" OR "plant-based ice cream" OR "artificial ice cream" OR "oat ice cream" OR "soy ice cream" OR "soy based ice cream" OR "soy-based ice cream" OR "ice cream substitute" OR "artificial ice cream" OR "dairy free butter" OR "dairy-free butter" OR "non dairy butter" OR "non-dairy butter" OR "vegan butter" OR "vegetarian butter" OR "plant based butter" OR "plant-based butter" OR "artificial butter" OR "oat butter" OR "soy butter" OR "soy based butter" OR "soy-based butter" OR "butter substitute" OR "artificial butter" OR "dairy free spread" OR "dairy-free spread" OR "non dairy spread" OR "non-dairy spread" OR "vegan spread" OR "vegetarian spread" OR "plant based spread" OR "plant-based spread" OR "artificial spread" OR "oat spread" OR "soy spread" OR "soy based spread" OR "soy-based spread" OR "spread substitute" OR "artificial spread" OR "dairy free yoghurt" OR "dairy-free yoghurt" OR "non dairy yoghurt" OR "non-dairy yoghurt" OR "vegan yoghurt" OR "vegetarian yoghurt" OR "plant based yoghurt" OR "plant-based yoghurt" OR "artificial yoghurt" OR "oat yoghurt" OR "soy yoghurt" OR "soy based yoghurt" OR "soy-based yoghurt" OR "yoghurt substitute" OR "artificial yoghurt" OR "oat milk" OR "rice milk" OR "corn milk" OR "spelt milk" OR "soy milk" OR "soymilk" OR "soya milk" OR "soyabean milk" OR "soybean milk" OR "peanut milk" OR "lupin milk" OR "cowpea milk" OR "almond milk" OR "coconut milk" OR "hazelnut milk" OR "pistachio milk" OR "walnut milk" OR "sesame milk" OR "flax milk" OR "hemp milk" OR "sunflower milk" OR "quinoa milk" OR "teff milk" OR "amaranth milk" OR "plant-based milk" OR "plant based milk" OR "vegan cheese" OR "non-dairy\*" OR "non dairy\*" OR "dairy-free" OR "dairy free" OR "milk style" OR "cheese style" OR "cream style" OR "ice cream style" OR margarine OR "artificial milk" OR "milk substitute" OR "plant milk" ) AND

( "CO2" OR "carbon dioxide" OR "GHG emissions" OR "greenhouse gas\*" OR "climate change" OR "acidifying emissions" OR "acidification" OR "eutrophying emissions" OR "eutrophication" OR "freshwater withdrawals" OR "freshwater use" OR "stress-weighted water use" OR "LOR Use" OR "LCA" OR "life cycle assessment" OR "acidification" OR "ecotoxicity" OR "eutrophication" OR "global warming\*" OR "ozone depletion" OR "land use" OR "water use" OR "biodiversity" OR "water scarcity" OR "carbon sequestration" OR "methane emissions" OR "nitrous oxides" OR "energy use" OR "soil health" OR "soil conservation" OR smog OR "smog formation" OR ozone OR "ozone formation" OR "soil erosion" OR "carbon storage" OR "plastic use" OR monoculture OR environment\* OR "carbon dioxide" OR methane OR "carbon footprint" OR "greenhouse gas\*" OR sustainab\* OR "greenhouse effect" OR "life cycle analysis" OR gwp OR "energy consumption" OR agriculture OR biodiversity OR biomass OR nitrogen OR phosphorus OR "food packaging" OR "water quality" OR "water footprint" OR "gas emissions" OR "industrial waste" OR "water management" OR "water supply" OR acidity OR biodegradation OR packaging OR pollution\* OR pollutant\* OR prebiotic OR "waste management" OR pesticides OR "water waste" OR phenotype OR pesticide OR leaching OR plastic OR plastics OR insecticides OR

"organic farming" OR "water contamination" OR wastewater OR "water holding capacity" OR ecology OR toxicity OR emission\* OR ecosystem\* OR climate OR anthropometry OR "biological monitoring" OR "intergovernmental panel on climate change" OR ipcc OR "water retention" OR degradation OR "waste products" ) )

AND ( LIMIT-TO ( SUBJAREA , "AGRI" ) OR LIMIT-TO ( SUBJAREA , "ENVI" ) OR LIMIT-TO ( SUBJAREA , "MULT" ) OR LIMIT-TO ( SUBJAREA , "ENER" ) OR LIMIT-TO ( SUBJAREA , "EART" ) ) AND ( LIMIT-TO ( DOCTYPE , "ar" ) OR LIMIT-TO ( DOCTYPE , "re" ) ) AND ( EXCLUDE ( PUBYEAR , 1999 ) OR EXCLUDE ( PUBYEAR , 1998 ) OR EXCLUDE ( PUBYEAR , 1997 ) OR EXCLUDE ( PUBYEAR , 1996 ) OR EXCLUDE ( PUBYEAR , 1995 ) OR EXCLUDE ( PUBYEAR , 1994 ) OR EXCLUDE ( PUBYEAR , 1993 ) OR EXCLUDE ( PUBYEAR , 1992 ) OR EXCLUDE ( PUBYEAR , 1991 ) OR EXCLUDE ( PUBYEAR , 1990 ) OR EXCLUDE ( PUBYEAR , 1989 ) OR EXCLUDE ( PUBYEAR , 1988 ) OR EXCLUDE ( PUBYEAR , 1987 ) OR EXCLUDE ( PUBYEAR , 1986 ) OR EXCLUDE ( PUBYEAR , 1985 ) OR EXCLUDE ( PUBYEAR , 1984 ) OR EXCLUDE ( PUBYEAR , 1983 ) OR EXCLUDE ( PUBYEAR , 1982 ) OR EXCLUDE ( PUBYEAR , 1981 ) OR EXCLUDE ( PUBYEAR , 1980 ) OR EXCLUDE ( PUBYEAR , 1979 ) OR EXCLUDE ( PUBYEAR , 1978 ) OR EXCLUDE ( PUBYEAR , 1977 ) OR EXCLUDE ( PUBYEAR , 1976 ) OR EXCLUDE ( PUBYEAR , 1975 ) OR EXCLUDE ( PUBYEAR , 1974 ) OR EXCLUDE ( PUBYEAR , 1973 ) OR EXCLUDE ( PUBYEAR , 1972 ) OR EXCLUDE ( PUBYEAR , 1970 ) OR EXCLUDE ( PUBYEAR , 1969 ) OR EXCLUDE ( PUBYEAR , 1968 ) OR EXCLUDE ( PUBYEAR , 1966 ) OR EXCLUDE ( PUBYEAR , 1965 ) OR EXCLUDE ( PUBYEAR , 1964 ) OR EXCLUDE ( PUBYEAR , 1963 ) OR EXCLUDE ( PUBYEAR , 1962 ) OR EXCLUDE ( PUBYEAR , 1960 ) OR EXCLUDE ( PUBYEAR , 1959 ) OR EXCLUDE ( PUBYEAR , 1956 ) OR EXCLUDE ( PUBYEAR , 1944 ) OR EXCLUDE ( PUBYEAR , 1919 ) ) AND ( LIMIT-TO ( LANGUAGE , "English" ) ) AND ( EXCLUDE ( PUBYEAR , 1971 ) OR EXCLUDE ( PUBYEAR , 1967 ) OR EXCLUDE ( PUBYEAR , 1961 ) OR EXCLUDE ( PUBYEAR , 1954 ) OR EXCLUDE ( PUBYEAR , 1943 ) OR EXCLUDE ( PUBYEAR , 1918 ) )
