# Supplementary material
Source: MDPI journal article supplement (https://www.mdpi.com/2071-1050/13/22/12599)
Supplement: s1 [file s1 › Supplementary material 3.xlsx]

## Sheet: All results
		Appendix of interest?	Results of EI analysis
Authors	Year		Products compared	Functional unit	System boundary	Country where products are sold	Country where the propducts are produced	Greenhouse gas emissions kg per kg product														Energy use, MJ per kg							Eutrophication potential, EP, kg PO4 eqv per kg							Acidification potential, AP, kg SO2 eqv per kg							Photochemical ozone depletion potential, POCP, kg C2 H4 eqv per kg
								Milk	Oat drink	Soy drink	Almond drink	Margarine/Spread. All plant based	Butter	Dairy spread	Dairy cream	Plant based cream	Butter/margarine	Cheese	Plan based cheese	Youghurt	Plant based youhurt	Milk	Oat drink	Soy drink	Almond drink	Margarine	Butter	Butter/margarine	Milk	Oat drink	Soy drink	Almond drink	Margarine	Butter	Butter/margarine	Milk	Oat drink	Soy drink	Almond drink	Margarine	Butter	Butter/margarine	Milk	Oat drink	Soy drink	Almond drink	Margarine	Butter	Butter/margarine
Smetana S., Leonhardt L., Kauppi S.-M., Pajic A., Heinz V.	2020	0	Butter, margarine and margarine with insect fat. Already published data was used for butter. Two examples of margarine.	1kg of product	Cradle to processing incl processing at the storage facility. Packaging was not included.	NA	Data about processing margarine comes from Germany					1,1-1,7	7,2-9,6. 20,7-21,3													18,2-26,0	30-42						0,013-0,017	0,04-0,06. 0,125						0,016-0,024	0,05-0,092. 0,26-0,27.
Liao X., Gerichhausen M.J.W., Bengoa X., Rigarlsford G., Beverloo R.H., Bruggeman Y., Rossi V.	2020	1	Plant based fat-spreads (212) plant based cream (16), total 228 plant based products where 201 had no butter fat while the others had small amount of butter. Butter and cream (40) with butter (21), cream (19). For Sweden 15 plantbased spreads, 1 butter and 3 dairy spreads. For Sweden 5 plantbased cream and 4 dairy based creams	1 kg of product	Cradle to grave. Including consumer stage and waste handling	21 countries in Europe and North America. Sweden is included	Various. For milk a country specific analyses was made considering e.g. management systems, herd size etc. The electricity mix in each production country was also considered. lUCs were also country specific.					Mean 3,25 kg, variation 0,98-6,93.	Mean 12,1 kg. Variation 8,08-16,93.	7.88	3.78	1.87
Winans K.S., Macadam-Somer I., Kendall A., Geyer R., Marvinney E.	2020	0	Almond milk and milk. One type of almond milk.	1 bottle of unsweetened almond milk (1.42 litre). Almonds grown i California.	Cradle to factory gate in primary packaging	USA	USA	2.25			0.5														10.4225
Yokessa M., Marette S.	2019	0	Milk and soy milk. One soy milk.	1litre of products	Not explained	Not explained	Not explained	1		0.075
Grant C.A., Hicks A.L.	2018	0	Milk, soy and almond drink. One value for both.	1 litre of product (also 1 kg of protein but this is not reported here)	Cradle to retail incl. retail	USA	USA	2,75 (1,82-3,93)		3.27	3,85 (2,95-5,38)
Clune S., Crossin E., Verghese K.	2017	0	Milk, soy drink, almond drink. 8 values for soy drink and 4 for almond drink	1 kg of product	Cradle to regional distribution centre	World	World	1,32 (0,54-2,39) Number of GWP values 175. European milk	-	0,88 (0,66-1,4)	0,42 (0,39-0,44)
Werner L.B., Flysjö A., Tholstrup T.	2014	0	Milk, soy drink. One value for soy drink.	1 kg as well as the nutritional content	Cradle to consumer. We used figures excluding waste.	Denmark	Not described	1.14		0.4
Ercin A.E., Aldaya M.M., Hoekstra A.Y.	2012	0	Milk and soy drink. 7 values for soy drinks.	1 litre of product	Cradle to producer incl. packaging	Not described	Belgium (factory), Canada and China (growing soy beans)
Meier T., Christen O.	2012	0	Butter and margarine. One value for margarine.	1 kg of product	Cradle to retail including retail	Germany	World					2.1	15.1
Nilsson K., Flysjö A., Davis J., Sim S., Unger N., Bell S.	2010	0	Margarine and butter, 7 products, one of the products were a mix of butter and margarine. 3 margarines.	500 grams of product	The life cycle until the products is delivered at the distribution centre of Unilever in each country. Waste handling of packages is also included.	UK, Germany and France	A range of countries both in and outside Europé. For margarin ingredients such as sunflower, rape seed and palm kernel oil was used. It is not specified where the oils came from					1,1, 1,32, 1,66	9,6, 9, 7,2				7.4									18,2, 22, 26	42, 30, 32	40					0,014,0,0132, 0,0166	0,06, 0,044, 0,044	0.046					0,0156, 0,024,0,024	0,076,0,092, 0,05	0.064					0,00062, 0,00124, 0,00104	0,00022, 0,000090, 0,000082	0.00056
Smedman A., Lindmark-Månsson H., Drewnowski A., Edman A.-K.M.	2010	0	Soy and oat drinks versus e.g. milk 1,5% (non-fortified drinks). One value for oat drink and one for soy drink.	A range of nutrients (nutrient density) but results are also available for grams of greenhouse gases per 100 grams of beverage	Crop and input production ,farm emissions, processing, packaging and transport to the retailer. Excluded: consumer phase incl waste handling as wellas carbon storage in soil as car	Sweden	For milk Sweden. For soy drink unclear. For oat milk an LCA made of Oatly products	0.99	0.21	0.3
Beckerman, JP; Blondin, SA; Richardson, SA; Rimm, EB	2019	0	Milk and soy drink. One value for soy drink	1 kg of product	Cradle to consumption incl. Disposal	USA	Not described	1,969 (1,877 for UHT milk)		0.531																														0.076
Poor et al	2019	1	Milk and soy drink. The observations differ for the various environmental impacts, see to the right.	1 litre	Cradle to retail with retail included	World	World	2.8 or 3.2 (8-4234)	-	1,0 (0,3-1,7)	-	-	-	-	-	-	-					-	-	-	-	-	-	-	0,017 (0,0022-0,0279)	-	0,0011 (0,00005-0,0043)	-	-	-	-	0,02 (0,005,6-0,0335)	-	0,0026 (0,0032-0,0048)					-	-	-	-	-	-	-
Wallen et al	2004	0	Butter and margarine. One value for margarine.	1 kg	Cradle to processing	Sweden	Sweden					2.12	0.98													24.4	12.6
Scheelbeek, P; Green, R; Papier, K; Knuppel, A; Alae-Carew, C; Balkwill, A; Key, TJ; Beral, V; Dangour, AD	2021	1	Milk, cream, butter and PB alternatives. One value for all PB alternatives.	1 kg	Not explained	UK	Various	1.53	-	0.88	0.99	4.19	9		4.89	2.64		8.87	1.76
Kolbe K.	2020	1	Butter, margarine, milk, PB milk, cheese, PB cheese, cream, PB cream. One value for each PB product except PB ceram (2 values).	1 kg	Not explained	Germany	Not explained	1.44	0.53	0.67		1.11	9.2		4.31	1,06, 0,53		5.82	1.66
Mogensen L., Heusale H., Sinkko T., Poutanen K., Sözer N., Hermansen J.E., Knudsen M.T.	2020	0	Yoghurt and oat yougurt. One value for PB youghurt.	1 kg and the daily intake of foods	Cradle to waste. Transportaion to home and home storage not included	Denmark	Various													1.281	0.881
Chapa J., Farkas B., Bailey R.L., Huang J.-Y.	2020	1	Milk and soy drink. One value for soy drink.	1 kg, energy, nutrition and sateity	Cradle to processing	USA	Various	0,81, 0,95, 0,91,1,12		0.29
De Laurentiis V., Hunt D.V.L., Lee S.E., Rogers C.D.F.	2019	1	Butter, margarine. 6 observations for margarine.	Meals . GHG emissions are also presented i kg per kg product	Cradle to plate.	UK	Various					1,224 (mean) 0,497-2,210 (min/max) 6 observations	8,085 (Mean). 7,2-9,6 (min/max). 6 observations
Corrado S., Luzzani G., Trevisan M., Lamastra L.	2019	0	Butter, margarine. One value for margarine.	Meals and kg food	Cradle to waste incl.the counsumer phase	Italy	Various					1,69, 1 value	8,16, 2 values
Heller M.C., Willits-Smith A., Meyer R., Keoleian G.A., Rose D.	2018	1	Milk, soy milk. One value for soy drink.	Diets and 1 kg of products	Cradle to processing	USA	USA	1.323		0.258												7.129		1.683
Authors	Year	Journal	Products compared	System boundary
Wallen et al	2004	Environmental Science and Policy	Margarine versus butter	Cradle to processing
Nilsson et al	2010	International Journal of Life Cycle Assessment	Margarine versus butter	The life cycle until the products is delivered at the distribution centre of Unilever in each country. Waste handling of packages is also included.
Smedman et al	2010	Food and Nutrition Research	Soy and oat drinks versus milk	Crop and input production ,farm emissions, processing, packaging and transport to the retailer. Excluded: consumer phase incl waste handling as wellas carbon storage in soil as car
Ercin et al	2012	Ecological Indicators	Soy drink versus milk	Cradle to producer incl. packaging
Meier&Christen	2012	International Journal of Life Cycle Assessment	Margarine versus butter	Cradle to retail including retail
Werner et al	2014	Food and Nutrition Research,	Soy drink versus milk	Cradle to consumer. We used figures excluding waste.
Clune et al	2017	Journal of Cleaner Production	Soy and almond drink versus milk	Cradle to regional distribution centre
Grant&Hicks	2018	Environmental Engineering Science	Soy and almond drink versus milk	Cradle to retail incl. retail
Heller et al	2018	Environmental Research Letters	Soy drink versus milk	Cradle to processing
Yokessa &Marette	2019	Sustainability	Soy drink versus milk	Not explained
Beckerman et al	2019	American Journal of Public Health	Soy drink versus milk	Cradle to consumption incl. Disposal
Poor et al	2019	Science	Soy drink versus milk	Cradle to retail with retail included
De Laurentiis et al	2019	International Journal of Life Cycle Assessment,	Margarine versus butter	Cradle to plate.
Corrado et al	2019	Science of the Total Environment	Margarine versus butter	Cradle to waste incl.the counsumer phase
Smetana et al	2020	Journal of Cleaner Production	Margarine versus butter	Cradle to processing incl processing at the storage facility. Packaging was not included.
Liao et al	2020	International Journal of Life Cycle Assessment	PB spreads, PB cream versus milkbased products	Cradle to grave. Including consumer stage and waste handling
Winans et al	2020	International Journal of Life Cycle Assessment	Almond drink versus milk	Cradle to factory gate in primary packaging
Kolbe	2020	Advances in Climate Change Research	PB drink, PB cheese, PB cream, PB spreads versus milk based products	Not explained
Mogensen et al	2020	Journal of Cleaner Production,	Oat yougurt versus yoghurt	Cradle to waste. Transportaion to home and home storage not included
Chapa et al	2020	Science of the Total Environment	Soy drink versus milk	Cradle to processing
Scheelbeek et al	2021	BMJ Open	PB drink, PB cream, PB cheese and PB spreads versus milk based products	Not explained
Share 2019 and 2020 and 2021
0.571429
[truncated: 24 more columns]

## Sheet: Drinks
		Own results of EI? 1/0	Appendix of interest?	Results of EI
Authors	Year			Products compared	Functional unit	System boundary	Country where products are sold	Country where the propducts are produced	Greenhouse gas emissions kg per kg														energy use PE, MJ per kg							Eutrophication potential, EP, kg PO4 eqv per kg							Acidification potential, AP, kg SO2 eqv per kg							Photochemical ozone depletion potential, POCP, kg C2 H4 eqv per kg
									Milk	Oat drink	Soy drink	Almond drink	Margarine/Spread. All plant based	Butter	Dairy spread	Dairy cream	Plant based cream	Butter/margarine	Cheese	Plan based cheese	Youghurt	Plant based youhurt	Milk	Oat drink	Soy drink	Almond drink	Margarine	Butter	Butter/margarine	Milk	Oat drink	Soy drink	Almond drink	Margarine	Butter	Butter/margarine	Milk	Oat drink	Soy drink	Almond drink	Margarine	Butter	Butter/margarine	Milk	Oat drink	Soy drink	Almond drink	Margarine	Butter
Winans K.S., Macadam-Somer I., Kendall A., Geyer R., Marvinney E.	2020	1	0	Almond milk and milk. One type of almond milk.	1 bottle of unsweetened almond milk (1.42 litre). Almonds grown i California.	Cradle to factory gate in primary packaging	USA	USA	2.25			0.5														10.4225
Yokessa M., Marette S.	2019	1	0	Milk and soy milk. One soy milk.	1litre of products	No explained	Not explained	Not explained	1		0.075
Grant C.A., Hicks A.L.	2018	1		Milk, soy and almond milk. One value for both.	1 litre of product (also 1 kg of protein but this is not reported here)	Cradle to retail incl. retail	USA	USA	2,75 (1,82-3,93)		3.27	3,85 (2,95-5,38)
Clune S., Crossin E., Verghese K.	2017	1	0	Milk, soy drink, almond drink. 8 values for soy drink and 4 for almond drink	1 kg of product	Cradle to regional distribution centre	World	World	1,32 (0,54-2,39) Number of GWP values 175. European milk	-	0,88 (0,66-1,4)	0,42 (0,39-0,44)
Werner L.B., Flysjö A., Tholstrup T.	2014	1	0	Milk, soy drink. One value for soy drink.	1 kg as well as the nutritional content	Cradle to consumer. We used figures excluding waste.	Denmark	Not described	1.14		0.4
Ercin A.E., Aldaya M.M., Hoekstra A.Y.	2012	1	0	Milk and soy drink. 7 values for soy drinks.	1 litre of product	Cradle to producer incl. packaging	Not described	Belgium (factory), Canada and China (growing soy beans)
Smedman A., Lindmark-Månsson H., Drewnowski A., Edman A.-K.M.	2010	1		Soy and oat drinks versus e.g. milk 1,5% (non-fortified drinks). One value for oat drink and one for soy drink.	A range of nutrients (nutrient density) but results are also available for grams of greenhouse gases per 100 grams of beverage	Crop and input production ,farm emissions, processing, packaging and transport to the retailer. Excluded: consumer phase incl waste handling as wellas carbon storage in soil as car	Sweden	For milk Sweden. For soy drink unclear. For oat milk an LCA made of Oatly products	0.99	0.21	0.3
Beckerman, JP; Blondin, SA; Richardson, SA; Rimm, EB	2019	1		Milk and soy drink. One value for soy drink.	1 kg of product	Cradle to consumption incl. Disposal	USA	Not described	1,969 (1,877 for UHT milk)		0.531																														0.076
Poor et al	2019	1		Milk and soy drink. The observations differ for the various environmental impacts, see to the right.	1 litre	Cradle to retail with retail included	World	World	2.8 or 3.2 (8-4234)	-	1,0 (0,3-1,7)	-	-	-	-	-	-	-					-	-	-	-	-	-	-	0,017 (0,0022-0,0279)	-	0,0011 (0,00005-0,0043)	-	-	-	-	0,02 (0,005,6-0,0335)	-	0,0026 (0,0032-0,0048)					-	-	-	-	-	-
Scheelbeek, P; Green, R; Papier, K; Knuppel, A; Alae-Carew, C; Balkwill, A; Key, TJ; Beral, V; Dangour, AD	2021	1	Yes	Milk, cream, butter and PB alternatives. One value for all PB alternatives.	1 kg	Not explained	UK	Various	1.53	-	0.88	0.99	4.19	9		4.89	2.64		8.87	1.76
Kolbe K.	2020	1	Yes	Butter, margarine, milk, PB milk, cheese, PB cheese, cream, PB cream. One value for each PB product except PB ceram (2 values).	1 kg	Not explained	Germany	Not explained	1.44	0.53	0.67		1.11	9.2		4.31	1,06, 0,53		5.82	1.66
Chapa J., Farkas B., Bailey R.L., Huang J.-Y.	2020	1	Yes	Milk and soy drink. One value for soy drink.	1 kg, energy, nutrition and sateity	Cradle to processing	USA	Various	0,81, 0,95, 0,91,1,12		0.29
Heller M.C., Willits-Smith A., Meyer R., Keoleian G.A., Rose D.	2018	1	Yes	Milk, soy milk. One value for soy drink.	Diets and 1 kg of products	Cradle to processing	USA	USA	1.323		0.258												7.129		1.683
Author	Year	Countries of sale	GHG emissions					Author	Year	Countries of sale	Water use
			Oat drink versus milk	Soy drink versus milk	Almond drink versus milk						Oat drink versus milk	Soy drink versus milk	Almond drink versus milk		Author	Year	Countries of sale	Energy use
Winans m.fl	2020	USA	-	-	0.222222			Winans m.fl	2020	USA	-	-	0.555556		Heller M.C., Willits-Smith A., Meyer R., Keoleian G.A., Rose D.	2018	USA	0.236078
Yokessa m.fl	2019	No information	-	0.075	-			Grant m.fl	2018	USA	-	0.644444	93.4188
Grant m.fl	2018	USA	-	1.18909	1.4			Ercin mfl	2012	No information	-	0.282857	-
Clune m.fl.	2017	World	-	0.666667	0.318182			Poor m.fl.	2019	World	-	0.044586	-			Author	Year	Countries of sale	Land use
Werner m.fl.	2014	Danmark	-	0.366972	-			Scheelbeek m.fl.	2021	UK	-	0.0819672	2.9918			Poor et al	2019	World	0.0777778
Smedman m.fl.	2010	Sweden	0.212121	0.30303	-
Beckerman m.fl.	2019	USA	-	0.26968	-											Author	Year	Countries of sale	Eutrophicating substances
Poor m.fl.	2019	World	-	0.266667	-			Author	Year	Countries of sale	Number of values	Water use				Poor et al	2019	World	0.0647059
Scheelbeek m.fl.	2021	UK	-	0.575163	0.647059							Oat drink versus milk	Soy drink versus milk	Almond drink versus milk
Kolbe	2020	Germany	0.368056	0.465278	0.465278			Ercin mfl	2012	No information	7	-	0.282857	-		Author	Year	Countries of sale	Acidifying substances
Chapa m.fl.	2020	USA	-	0.306069	-			Grant m.fl	2018	USA	1	-	0.644444	93.4188		Poor et al	2019	World	0.13
Heller m.fl.	2018	USA	-	0.195011	-			Poor m.fl.	2019	World	47	-	0.044586	-
								Winans m.fl	2020	USA	1	-	-	0.555556
Sorted table								Scheelbeek m.fl.	2021	UK	1	-	0.0819672	2.9918
Author	Year	Countries of sale	Number of values	GHG emissions				Number of values				0	57	3
				Oat drink versus milk	Soy drink versus milk	Almond drink versus milk
Smedman m.fl.	2010	Sweden	1 och 1	0.212121	0.30303	-
Werner m.fl.	2014	Danmark	1	-	0.366972	-
Clune m.fl.	2017	World	8 och 4	-	0.666667	0.318182
Grant m.fl	2018	USA	1 och 1	-	1.18909	1.4
Heller m.fl.	2018	USA	1	-	0.195011	-
Yokessa m.fl	2019	No information	1	-	0.075	-
Beckerman m.fl.	2019	USA	1	-	0.26968	-
Poor m.fl.	2019	World	47	-	0.266667	-
Winans m.fl	2020	USA	1	-	-	0.222222
Kolbe	2020	Germany	1,1 och 1	0.368056	0.465278	0.465278
Chapa m.fl.	2020	USA	1	-	0.306069	-
Scheelbeek m.fl.	2021	UK	1 och 1	-	0.575163	0.647059
Number of values				2	64	8
[truncated: 25 more columns]

## Sheet: Cream and youghurt
		Own results of EI? 1/0	Appendix of interest?	Results of EI																			Primary energy use PE							Eutrophication potential, EP							Acidification potential, AP							Photochemical ozone depletion potential, POCP
Authors	Year			Products compared	Functional unit	System boundary	Country where products are sold	Country where the propducts are produced	Greenhouse gas emissions kg per kg product														MJ per kg							kg PO4 eqv per kg product							kg SO2 eqv per kg product							kg C2 H4 eqv per kg product
									Milk	Oat drink	Soy drink	Almond drink	Margarine/Spread. All plant based	Butter	Dairy spread	Dairy cream	Plant based cream	Butter/margarine	Cheese	Plan based cheese	Youghurt	Plant based youhurt	Milk	Oat drink	Soy drink	Almond drink	Margarine	Butter	Butter/margarine	Milk	Oat drink	Soy drink	Almond drink	Margarine	Butter	Butter/margarine	Milk	Oat drink	Soy drink	Almond drink	Margarine	Butter	Butter/margarine	Milk	Oat drink	Soy drink	Almond drink	Margarine	Butter
Liao X., Gerichhausen M.J.W., Bengoa X., Rigarlsford G., Beverloo R.H., Bruggeman Y., Rossi V.	2020	1	1	Plant based fat-spreads (212) plant based cream (16), total 228 plant based products where 201 had no butter fat while the others had small amount of butter. Butter and cream (40) with butter (21), cream (19). For Sweden 15 plantbased spreads, 1 butter and 3 dairy spreads. For Sweden 5 plantbased cream and 4 dairy based creams	1 kg of product	Cradle to grave. Including consumer stage and waste handling	21 countries in Europé and North America. Sweden is included	Various. For milk a country specific analyses was made considering e.g. managemnt systems, herd size etc. The electricity mix in each production country was also considered. lUCs were also country specific.					Mean 3,3 kg, variation 0,98-6,93.	Mean 12.1 kg. Variation 8,08-16,93.	7.9	3.8	1.9
Scheelbeek, P; Green, R; Papier, K; Knuppel, A; Alae-Carew, C; Balkwill, A; Key, TJ; Beral, V; Dangour, AD	2021	1	Yes	Milk, cream, butter and PB alternatives. One value for all PB alternatives.	1 kg	Not explained	UK	Various	1.53	-	0.88	0.99	4.19	9		4.89	2.64		8.87	1.76
Kolbe K.	2020	1	Yes	Butter, margarine, milk, PB milk, cheese, PB cheese, cream, PB cream. One value for each PB product except PB ceram (2 values).	1 kg	Not explained	Germany	Not explained	1.44	0.53	0.67		1.11	9.2		4.31	1,06, 0,53		5.82	1.66
Mogensen L., Heusale H., Sinkko T., Poutanen K., Sözer N., Hermansen J.E., Knudsen M.T.	2020	1	No	Yoghurt and oat yougurt. One value for PB youghurt.	1 kg and the daily intake of foods	Cradle to waste. Transportaion to home and home storage not included	Denmark	Various													1.281	0.881
Author	Year	Countries of sale	Number of values	GHG emissions			Author	Year	Countries of sale	Land use
				PB alternatives to cream versus cream	PB alternatives to yoghurt versus yoghurt					PB alternatives to cream versus cream	PB alternatives to yoghurt versus yoghurt
Liao m.fl	2020	21 countries i Europa och Nordamerika	16	0.5	-		Liao m.fl	2020	21 countries i Europa och Nordamerika	0.575758	-
Scheelbek m.fl.	2021	UK	1	0.539877	-		Mogensen m.fl.	2020	Danmark	-	0.416667
Kolbe	2020	Germany	2	0.184455	-
Mogensen m.fl.	2020	Danmark	1	-	0.687744		Author	Year	Countries of sale	Water use
										PB alternatives to cream versus cream	PB alternatives to yoghurt versus yoghurt
Number of values				19	1		Liao m.fl	2020	21 countries i Europa och Nordamerika	0.666667	-
							Scheelbek m.fl.	2021	UK	0.136364	-
[truncated: 25 more columns]

## Sheet: Cheese
		Own results of EI? 1/0	Appendix of interest?	Results of EI																			Primary energy use PE							Eutrophication potential, EP							Acidification potential, AP							Photochemical ozone depletion potential, POCP
Authors	Year			Products compared	Functional unit	System boundary	Country where products are sold	Country where the propducts are produced	Greenhouse gas emissions kg per kg product														MJ per kg							kg PO4 eqv per kg product							kg SO2 eqv per kg product							kg C2 H4 eqv per kg product
									Milk	Oat drink	Soy drink	Almond drink	Margarine/Spread. All plant based	Butter	Dairy spread	Dairy cream	Plant based cream	Butter/margarine	Cheese	Plan based cheese	Youghurt	Plant based youhurt	Milk	Oat drink	Soy drink	Almond drink	Margarine	Butter	Butter/margarine	Milk	Oat drink	Soy drink	Almond drink	Margarine	Butter	Butter/margarine	Milk	Oat drink	Soy drink	Almond drink	Margarine	Butter	Butter/margarine	Milk	Oat drink	Soy drink	Almond drink	Margarine	Butter
Scheelbeek, P; Green, R; Papier, K; Knuppel, A; Alae-Carew, C; Balkwill, A; Key, TJ; Beral, V; Dangour, AD	2021	1	Yes	Milk, cream, butter and PB alternatives, cheese. One value for all PB alternatives.	1 kg	Not explained	UK	Various	1.53	-	0.88	0.99	4.19	9		4.89	2.64		8.87	1.76
Kolbe K.	2020	1	Yes	Butter, margarine, milk, PB milk, cheese, PB cheese, cream, PB cream. One value for each PB product except PB ceram (2 values)..	1 kg	Not explained	Germany	Not explained	1.44	0.53	0.67		1.11	9.2		4.31	1,06, 0,53		5.82	1.66
																				0.198422
Author	Year	Number of values	Countries of sale	GHG emissions		Author	Year	Countries of sale	Water use											0.285223
Scheelbeek, P; Green, R; Papier, K; Knuppel, A; Alae-Carew, C; Balkwill, A; Key, TJ; Beral, V; Dangour, AD	2021	1	UK	0.198422		Scheelbeek, P; Green, R; Papier, K; Knuppel, A; Alae-Carew, C; Balkwill, A; Key, TJ; Beral, V; Dangour, AD	2021	UK	0.030303
Kolbe K.	2020	1	Germany	0.285223
[truncated: 25 more columns]

## Sheet: Spreads
		Own results of EI? 1/0	Appendix of interest?	Results of EI
Authors	Year			Products compared	Functional unit	System boundary	Country where products are sold	Country where the propducts are produced	Greenhouse gas emissions kg per kg product														Energy use PE, MJ per kg							Eutrophication potential, EP, kg PO4 eqv per kg							Acidification potential, AP, kg SO2 eqv per kg							Photochemical ozone depletion potential, POCP, kg C2 H4 eqv per kg
									Milk	Oat drink	Soy drink	Almond drink	Margarine/Spread. All plant based	Butter	Dairy spread	Dairy cream	Plant based cream	Butter/margarine	Cheese	Plan based cheese	Youghurt	Plant based youhurt	Milk	Oat drink	Soy drink	Almond drink	Margarine	Butter	Butter/margarine	Milk	Oat drink	Soy drink	Almond drink	Margarine	Butter	Butter/margarine	Milk	Oat drink	Soy drink	Almond drink	Margarine	Butter	Butter/margarine	Milk	Oat drink	Soy drink	Almond drink	Margarine	Butter
Smetana S., Leonhardt L., Kauppi S.-M., Pajic A., Heinz V.	2020	1	0	Butter, margarine and margarine with insect fat. Already published data was used for butter. Two margarines	1kg of product	Cradle to processing incl processing at the storage facility. Packaging was not included.	NA	Data about processing margarine comes from Germany					1,1-1,7	7,2-9,6. 20,7-21,3													18,2-26,0	30-42						0,013-0,017	0,04-0,06. 0,125						0,016-0,024	0,05-0,092. 0,26-0,27.
Liao X., Gerichhausen M.J.W., Bengoa X., Rigarlsford G., Beverloo R.H., Bruggeman Y., Rossi V.	2020	1	1	Plant based fat-spreads (212) plant based cream (16), total 228 plant based products where 201 had no butter fat while the others had small amount of butter. Butter and cream (40) with butter (21), cream (19). For Sweden 15 plantbased spreads, 1 butter and 3 dairy spreads. For Sweden 5 plantbased cream and 4 dairy based creams	1 kg of product	Cradle to grave. Including consumer stage and waste handling	21 countries in Europé and North America. Sweden is included	Various. For milk a country specific analyses was made considering e.g. managemnt systems, herd size etc. The electricity mix in each production country was also considered. lUCs were also country specific.					Mean 3,3 kg, variation 0,98-6,93.	Mean 12.1 kg. Variation 8,08-16,93.	7.9	3.8	1.9
Höglund A.T.	2020
Meier T., Christen O.	2012	1	0	Butter and margarine. One value for margarine.	1 kg of product	Cradle to retail including retail	Germany	World					2.1	15.1
Nilsson K., Flysjö A., Davis J., Sim S., Unger N., Bell S.	2010	1	0	Margarine and butter, 7 products, one of the products were a mix of butter and margarine. 3 butters, 3 margarines, 1 mix.	500 grams of product	The life cycle until the products is delivered at the distribution centre of Unilever in each country. Waste handling of packages is also included.	UK, Germany and France	A range of countries both in and outside Europé. For margarin ingredients such as sunflower, rape seed and palm kernel oil was used. It is not specified where the oils came from					1,1, 1,32, 1,66	9,6, 9, 7,2				7.4									18,2, 22, 26	42, 30, 32	40					0,014,0,0132, 0,0166	0,06, 0,044, 0,044	0.046					0,0156, 0,024,0,024	0,076,0,092, 0,05	0.064					0,00062, 0,00124, 0,00104	0,00022, 0,000090, 0,000082
Wallen et al	2004	1		Butter and margarine. One value for margarine.	1 kg	Cradle to processing	Sweden	Sweden					2.12	0.98													24.4	12.6
Scheelbeek, P; Green, R; Papier, K; Knuppel, A; Alae-Carew, C; Balkwill, A; Key, TJ; Beral, V; Dangour, AD	2021	1	Yes	Milk, cream, butter and PB alternatives. One value for all PB alternatives.	1 kg	Not explained	UK	Various	1.53	-	0.88	0.99	4.19	9		4.89	2.64		8.87	1.76
Kolbe K.	2020	1	Yes	Butter, margarine, milk, PB milk, cheese, PB cheese, cream, PB cream . One value for each PB product except PB ceram (2 values).	1 kg	Not explained	Germany	Not explained	1.44	0.53	0.67		1.11	9.2		4.31	1,06, 0,53		5.82	1.66
De Laurentiis V., Hunt D.V.L., Lee S.E., Rogers C.D.F.	2019	1	Yes	Butter, margarine. 6 observations for margarine.	Meals . GHG emissions are also presented i kg per kg product	Cradle to plate.	UK	Various					1,224 (mean) 0,497-2,210 (min/max) 6 observations	8,085 (Mean). 7,2-9,6 (min/max). 6 observations
Corrado S., Luzzani G., Trevisan M., Lamastra L.	2019	1	No	Butter, margarine. One value for margarine.	Meals and kg food	Cradle to waste incl.the counsumer phase	Italy	Various					1,69, 1 value	8,16, 2 values
Author	Year	Countries of sale	Number of values	GHG emissions			Author	Year	Number of values	Countries of sale	Energy use
				PB alternatives versus butter							PB alternatives versus butter
Wallen m.fl.	2004	Sweden	1	2.16327	-		Smetana m.fl.	2020	2	No information	0.613889
Nilsson m.fl.	2010	UK, Germany och Frankrike	3	0.15814			Nilsson m.fl.	2010	3	UK, Germany och Frankrike	0.612963
Meier m.fl.	2012	Germany	1	0.138981	-		Wallen m.fl.	2004	1	Sweden	1.93651
De Laurentiis m.fl.	2019	UK	6	0.151391	-		Number of values		6
Corrado m.fl.	2019	Italien	1	0.207108	-		Author	Year	Countries of sale	Number of values	Land use
Smetana m.fl.	2020	No information	2	0.166667	-						PB alternatives versus butter
Liao m.fl.	2020	21 countries i Europa och Nordamerika	212	0.272727	-		Smetana S., Leonhardt L., Kauppi S.-M., Pajic A., Heinz V.	2020	No information	2	0.393939
Kolbe	2020	Germany	1	0.120652			Liao X., Gerichhausen M.J.W., Bengoa X., Rigarlsford G., Beverloo R.H., Bruggeman Y., Rossi V.	2020	21 countries i Europa och Nordamerika	212	0.3264
Scheelbeek m.fl.	2021	UK	1	0.465556	-		Meier m.fl.	2012	Germany	1	0.153846
Number of values			228				Nilsson m.fl.	2010	UK, Germany och Frankrike	3	0.433566
Author	Year	Countries of sale	Number of values	Water use			Number of values			218
				PB alternatives versus butter
Liao X., Gerichhausen M.J.W., Bengoa X., Rigarlsford G., Beverloo R.H., Bruggeman Y., Rossi V.	2020	21 countries i Europa och Nordamerika	212	0.384615			Author	Year	Countries of sale	Number of values	Eutrophicating substances
Meier m.fl.	2012	Germany	1	0.166667							PB alternatives versus butter
Scheelbeek m.fl.	2021	UK	1	0.742268			Smetana S., Leonhardt L., Kauppi S.-M., Pajic A., Heinz V.	2020	No information	2	0.2
Number of values			214				Nilsson m.fl.	2010	UK, Germany och Frankrike	3	0.295946
							Number of values			5
Author	Year	Countries of sale	Ozon depleting substances
			PB alternatives versus butter				Author	Year	Countries of sale		Acidifying substances
Nilsson m.fl.	2010	UK, Germany och Frankrike	4.55102							Number of values	PB alternatives versus butter
							Smetana S., Leonhardt L., Kauppi S.-M., Pajic A., Heinz V.	2020	No information	2	0.119048
							Nilsson m.fl.	2010	UK, Germany och Frankrike	3	0.291743
							Number of values			5
[truncated: 25 more columns]

## Sheet: Weighted averages
WA
	Greenhouse gas emissions	Water use	Land use	Energy use	Eutrophication emisions	Acidification emissions	Ozon depleting emissions
Oat drink versus milk	0.290088	-	-	-	-	-	-
Soy drink versus milk	0.337687	0.132691	0.08	0.24	0.06	0.13	-
Almond drink versus milk	0.500911	32.3221	-	-	-	-	-
PB cream versus milkbased cream	0.468884	0.635472	0.575758	-	-	-	-
PB youghurt versus milkbased youghurt	0.687744	-	0.416667	-	-	-	-
PB spreads versus milkbased spreds	0.274692	0.385268	0.327703	0.833862	0.257568	0.222665	4.55102
PB cheese versus milkbased cheese	0.241823	0.030303	-	-	-	-	-

## Sheet: References
Beckerman, J. P., Blondin, S. A., Richardson, S. A., & Rimm, E. B. (2019). Environmental and economic effects of changing to shelf-stable dairy or soy milk for the breakfast in the classroom program. American Journal of Public Health, 109(5), 736–738. https://doi.org/10.2105/AJPH.2019.304956.
Chapa, J., Farkas, B., Bailey, R. L., & Huang, J.-Y. (2020). Evaluation of environmental performance of dietary patterns in the United States considering food nutrition and satiety. Science of the Total Environment, 722. https://doi.org/10.1016/j.scitotenv.2020.137672.
Clune, S., Crossin, E., & Verghese, K. (2017). Systematic review of greenhouse gas emissions for different fresh food categories. Journal of Cleaner Production, 140, 766–783. https://doi.org/10.1016/j.jclepro.2016.04.082
Corrado, S., Luzzani, G., Trevisan, M., & Lamastra, L. (2019). Contribution of different life cycle stages to the greenhouse gas emissions associated with three balanced dietary patterns. Science of the Total Environment, 660, 622–630. https://doi.org/10.1016/j.scitotenv.2018.12.267
De Laurentiis, V., Hunt, D. V. L., Lee, S. E., & Rogers, C. D. F. (2019). EATS: a life cycle-based decision support tool for local authorities and school caterers. International Journal of Life Cycle Assessment, 24(7), 1222–1238. https://doi.org/10.1007/s11367-01
Ercin, A. E., Aldaya, M. M., & Hoekstra, A. Y. (2012). The water footprint of soy milk and soy burger and equivalent animal products. Ecological Indicators, 18, 392–402. https://doi.org/10.1016/j.ecolind.2011.12.009.
Grant, C. A., & Hicks, A. L. (2018). Comparative life cycle assessment of milk and plant-based alternatives. Environmental Engineering Science, 35(11), 1235–1247. https://doi.org/10.1089/ees.2018.0233.
Heller, M. C., Willits-Smith, A., Meyer, R., Keoleian, G. A., & Rose, D. (2018). Greenhouse gas emissions and energy use associated with production of individual self-selected US diets. Environmental Research Letters, 13(4). https://doi.org/10.1088/1748-9326/aab0ac.
Kolbe, K. (2020). Mitigating climate change through diet choice: Costs and CO2 emissions of different cookery book-based dietary options in Germany. Advances in Climate Change Research, 11(4), 392–400. https://doi.org/10.1016/j.accre.2020.11.003.
Liao, X., Gerichhausen, M. J. W., Bengoa, X., Rigarlsford, G., Beverloo, R. H., Bruggeman, Y., & Rossi, V. (2020). Large-scale regionalised LCA shows that plant-based fat spreads have a lower climate, land occupation and water scarcity impact than dairy butter. International Journal of Life Cycle Assessment, 25(6), 1043–1058. https://doi.org/10.1007/s11367-019-01703-w
Meier, T., & Christen, O. (2012). Gender as a factor in an environmental assessment of the consumption of animal and plant-based foods in Germany. International Journal of Life Cycle Assessment, 17(5), 550–564. https://doi.org/10.1007/s11367-012-0387-x
Mogensen, L., Heusale, H., Sinkko, T., Poutanen, K., Sözer, N., Hermansen, J. E., & Knudsen, M. T. (2020). Potential to reduce GHG emissions and land use by substituting animal-based proteins by foods containing oat protein concentrate. Journal of Cleaner Production, 274. https://doi.org/10.1016/j.jclepro.2020.122914.
Nilsson, K., Flysjö, A., Davis, J., Sim, S., Unger, N., & Bell, S. (2010). Comparative life cycle assessment of margarine and butter consumed in the UK, Germany and France. International Journal of Life Cycle Assessment, 15(9), 916–926. https://doi.org/10.1007/s11367-010-0220-3
Poore, J., & Nemecek, T. (2019). Reducing food’s environmental impacts through producers and consumers. Science, 360(6392), 987 LP – 992. https://doi.org/10.1126/science.aaq0216.
Scheelbeek, P., Green, R., Papier, K., Knuppel, A., Alae-Carew, C., Balkwill, A., Dangour, A. D. (2021). Health impacts and environmental footprints of diets that meet the Eatwell Guide recommendations: analyses of multiple UK studies. BMJ Open, 10(8), e037554. https://doi.org/10.1136/bmjopen-2020-037554.
Smedman, A., Lindmark-Månsson, H., Drewnowski, A., & Edman, A.-K. M. (2010). Nutrient density of beverages in relation to climate impact. Food and Nutrition Research, 54. https://doi.org/10.3402/fnr.v54i0.5170
Smetana, S., Leonhardt, L., Kauppi, S.-M., Pajic, A., & Heinz, V. (2020). Insect margarine: Processing, sustainability and design. Journal of Cleaner Production, 264. https://doi.org/10.1016/j.jclepro.2020.121670.
Wallén, A., Brandt, N., & Wennersten, R. (2004). Does the Swedish consumer’s choice of food influence greenhouse gas emissions? Environmental Science and Policy, 7(6), 525–535. https://doi.org/10.1016/j.envsci.2004.08.004
Werner, L. B., Flysjö, A., & Tholstrup, T. (2014). Greenhouse gas emissions of realistic dietary choices in Denmark: The carbon footprint and nutritional value of dairy products. Food and Nutrition Research, 58. https://doi.org/10.3402/fnr.v58.20687
Winans, K. S., Macadam-Somer, I., Kendall, A., Geyer, R., & Marvinney, E. (2020). Life cycle assessment of California unsweetened almond milk. International Journal of Life Cycle Assessment, 25(3), 577–587. https://doi.org/10.1007/s11367-019-01716-5
Yokessa, M., & Marette, S. (2019). A tax coming from the IPCC carbon prices cannot change consumption: Evidence from an experiment. Sustainability (Switzerland), 11(18). https://doi.org/10.3390/su11184834
